# Supplementary material
Source: PubMed Central journal article supplement (PMC1890505)

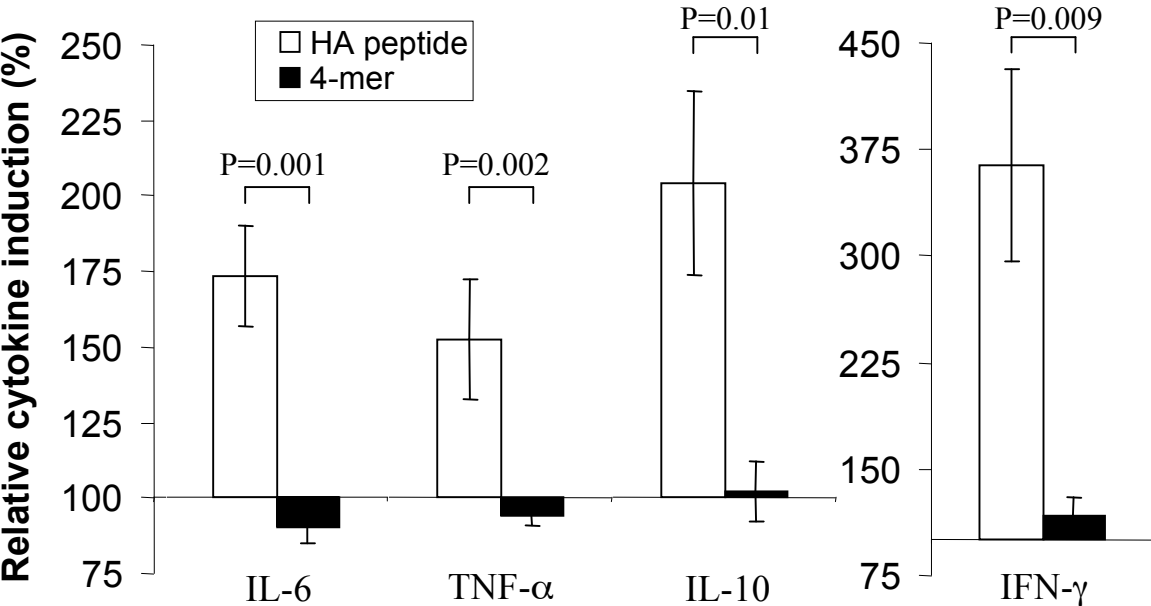

Supplement: pnas_0610423104_2.pdf [file pnas_0610423104_2.pdf]
